# Supplementary material for: Combination of ultrasound-based mechanical disruption of tumor with immune checkpoint blockade modifies tumor microenvironment and augments systemic antitumor immunity
Source: PubMed Central journal article supplement — J Immunother Cancer. 2022 Jan 17;10(1):e003717. doi: 10.1136/jitc-2021-003717 (PMC8765068; doi:10.1136/jitc-2021-003717), 2022-01-17
Supplement: jitc-2021-003717supp002.pdf [file jitc-2021-003717supp002.pdf]

**Supplementary Table 1. Antibodies Used for Flow Cytometry**

| Antibody             | Clone       | Conjugate    | Company     | Catalogue # |
|----------------------|-------------|--------------|-------------|-------------|
| <b>CD11b</b>         | M1/70       | APC/Cy7      | BD          | 557657      |
| <b>CD49b</b>         | DX5         | PE/TR        | BD          | 562453      |
| <b>F4/80</b>         | BM8         | PE/Cy7       | eBioscience | 25-4801-82  |
| <b>Ly6G</b>          | 1A8         | AF700        | BD          | 561236      |
| <b>CD11c</b>         | N418        | BV421        | Bio Legend  | 117330      |
| <b>CD3</b>           | 17A2        | APC          | Bio Legend  | 117330      |
| <b>CD3</b>           | 145-2C11    | BV421        | Bio Legend  | 100336      |
| <b>CD4</b>           | RM4-5       | PE/TR        | Bio Legend  | 100566      |
| <b>CD4</b>           | RM4-5       | FITC         | Bio Legend  | 116004      |
| <b>CD8b</b>          | YTS1567.7.  | APC/Cy7      | Bio Legend  | 126620      |
| <b>CD45</b>          | 30-F11      | BV605        | Bio Legend  | 103116      |
| <b>CD69</b>          | H1.2F3      | FITC         | Bio Legend  | 104506      |
| <b>CD206</b>         | C068C2      | PerCP-Cy5.5  | Bio Legend  | 141716      |
| <b>Ki67</b>          | B56         | PerCP-Cy5.5  | BD          | 561284      |
| <b>ICOS</b>          | C398.4A     | PE/Cy7       | Bio Legend  | 313520      |
| <b>Granzyme B</b>    | GB11        | Pacific Blue | Bio Legend  | 515408      |
| <b>Mouse IgG1, κ</b> | MOPC-21     | Pacific Blue | Bio Legend  | 400131      |
| <b>Foxp3</b>         | MF-14       | PE           | Bio Legend  | 126404      |
| <b>Rat IgG2b, κ</b>  | RTK4530     | PE           | Bio Legend  | 400608      |
| <b>PD-1</b>          | 29F.1A12    | APC          | Bio Legend  | 135210      |
| <b>PDL1</b>          | 10F.9G2     | PE           | Bio Legend  | 124308      |
| <b>TIM-3</b>         | B8.2C12     | PE           | Bio Legend  | 134004      |
| <b>LAG-3</b>         | C9B7W       | APC          | Bio Legend  | 125210      |
| <b>IA/IE</b>         | M5/114.15.2 | FITC         | Bio Legend  | 10760       |
| <b>CD80</b>          | 16-10A1     | PE           | BD          | 553769      |
