# Supplementary material for: Combination of ultrasound-based mechanical disruption of tumor with immune checkpoint blockade modifies tumor microenvironment and augments systemic antitumor immunity
Source: PubMed Central journal article supplement — J Immunother Cancer. 2022 Jan 17;10(1):e003717. doi: 10.1136/jitc-2021-003717 (PMC8765068; doi:10.1136/jitc-2021-003717), 2022-01-17
Supplement: jitc-2021-003717supp003.pdf [file jitc-2021-003717supp003.pdf]

## Supplementary Figure 1

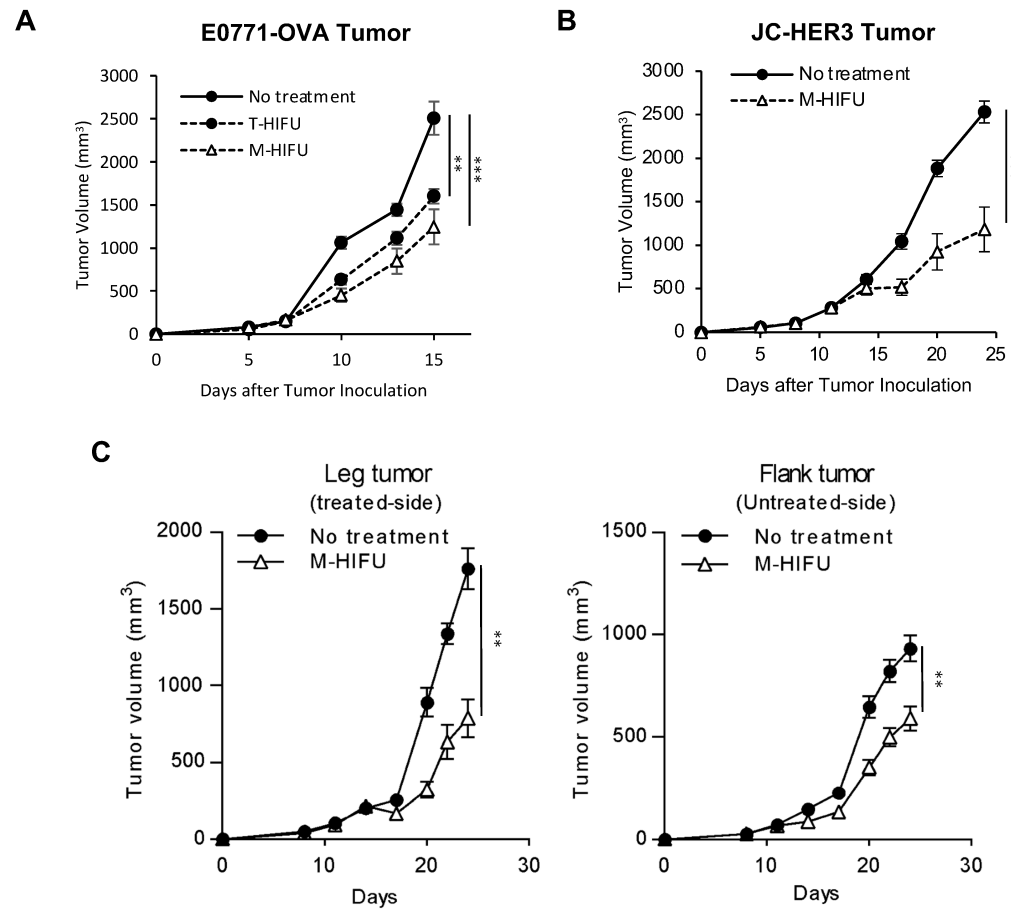

**Supplementary Figure 1. Stronger tumor growth suppression and abscopal effect induced by M-HIFU against murine breast cancers.**

(A) E0771-OVA tumors grown in the leg of C57BL/6 mice were treated with M-HIFU or T-HIFU 7 days after tumor cell implantation. Tumor sizes were monitored every 2-3 days. n=5 mice (no treatment and T-HIFU) or 6 (M-HIFU). 16 mice in total. (B) JC-HER3 cells were subcutaneously injected into the left leg ( $1 \times 10^6$  cells) of HER3 transgenic mice. Established leg tumors at 5-7 mm in a diameter were treated with M-HIFU treatment on day 7. Growth curves of leg tumors in M-HIFU treated and untreated groups are shown. Bar represents mean  $\pm$  SE. n=9 mice per each group. 18 mice in total. P values: \*\*p < 0.005, \*\*\*p < 0.001. (C) JC-HER3 cells were injected into both the left leg ( $1 \times 10^6$ ) and the right flank ( $5 \times 10^5$ ) of HER3 transgenic mice on day 0. Established leg tumors were treated with M-HIFU on day 11. The growth curves of M-HIFU-treated leg tumors and untreated flank tumors were compared and shown. Bar represents mean  $\pm$  SE. n=9 mice per each group. 18 mice in total. P value: \*\*p < 0.01.

## Supplementary Figure 2

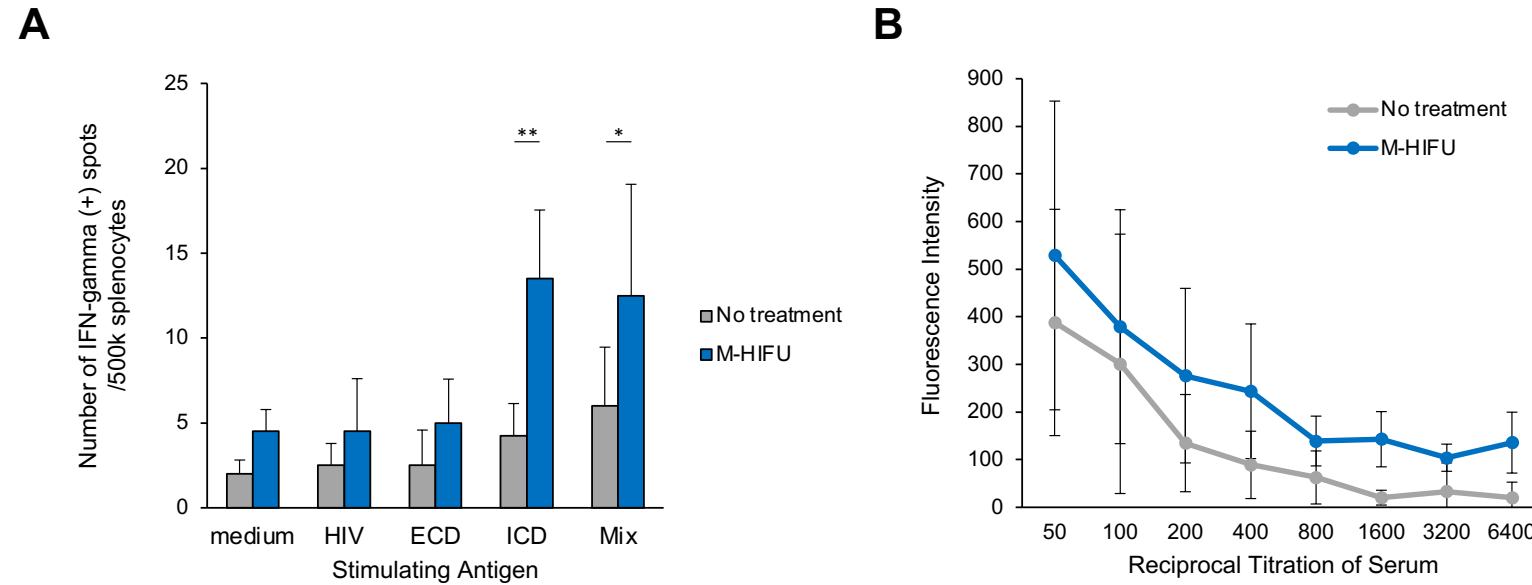

**Supplementary Figure 2. HER3 antigen-specific immune responses induced in M-HIFU treated JC-HER3 tumor-bearing mice.**

Twenty-four days after JC-HER3 cell inoculation to female HER3 transgenic mice (13 days after M-HIFU treatment), mice were euthanized, and spleen and blood were collected for the assays. **A**) IFN-gamma production by splenocytes was assessed by ELISpot assay. Average values of spot numbers for medium, HIV, HER3 peptide of ECD, ICD and mix (ECD+ICD) are shown. n=5 mice for each group. Bars represent SD. **B**) Anti-HER3 antibody in the serum of mice was evaluated with Cell-based ELISA, in which 4T1-HER3 cells (HER3-positive) and parental 4T1 cells (HER3-negative) were used for labeling with serial dilution of mouse serum. n=5 mice for each group. Bar represents mean SD.

## Supplementary Figure 3

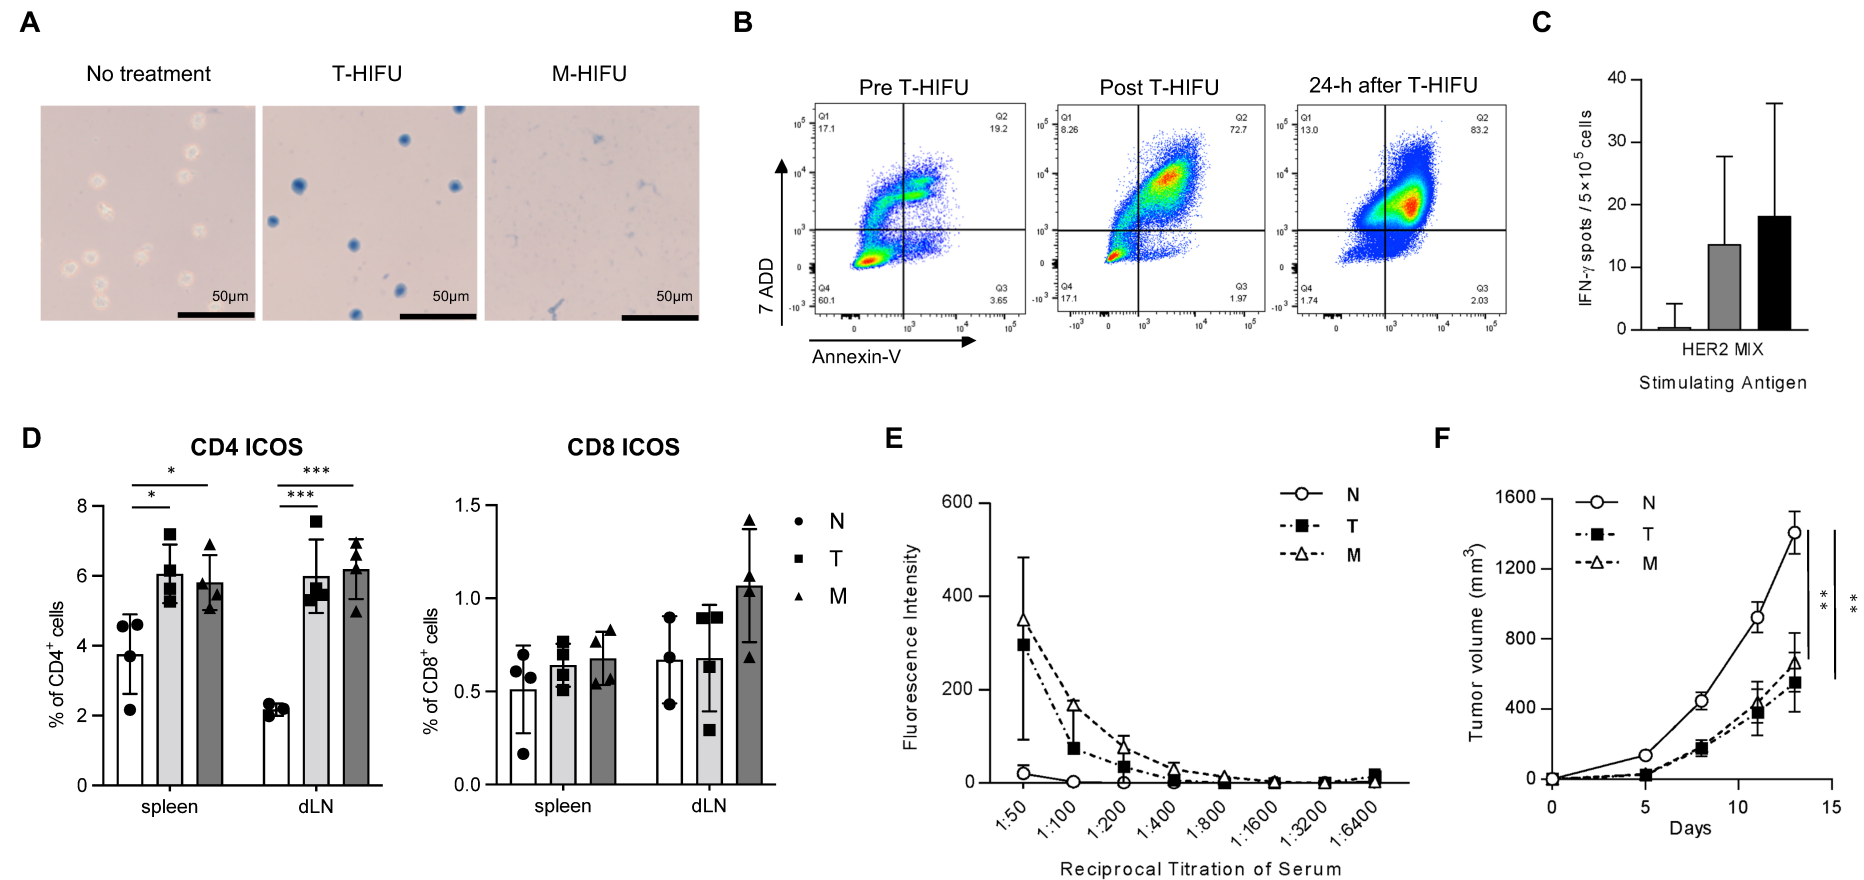

**Supplementary Figure 3. Cell death and immunogenicity of HIFU treated MM3MG-HER2 breast cancer cells.** (A) Cell suspensions of MM3MG-HER2 cells were treated with M- HIFU (Duty cycle 2%, PRF 2Hz, Power 200W, Time 20sec) or T-HIFU (Duty cycle 50%, PRF 1Hz, Power 50W, Time 10sec) *in vitro*. After *in vitro* HIFU, cells were stained with trypan blue. The experiment was performed in triplicate, showing consistent results. (B) The proportion of Annexin V+/7-ADD- or Annexin V+/7-ADD+ cells at pre-, post T-HIFU and twenty-four hours after T-HIFU were analyzed with flow cytometry. (C-F) On day -14 and -7, mice were vaccinated with  $1 \times 10^6$  MM3MG-HER2 cells treated with M- HIFU or T-HIFU *in vitro*. Spleen and draining lymph nodes (both-side inguinal lymph nodes) were collected on day 0. (C) HER2 antigen-specific cellular response was analyzed by IFN- $\gamma$  ELISpot assay. Average values of spot numbers for HER2 peptide mix (ECD+ICD) are shown.  $n = 4$  per group. (D) The percentages of ICOS<sup>+</sup> cells within the CD4<sup>+</sup> or CD8<sup>+</sup> cell population in spleen and draining lymph nodes were analyzed by flow cytometry and shown.  $n = 4$  per group. (E) The levels of anti-HER2 antibody in the serum of the vaccinated mice were evaluated with cell-based ELISA.  $n = 3$  per group. (F) As described in (C), mice were vaccinated by intradermal injection of *in vitro* HIFU-treated MM3MG-HER2 cells into the back on days -14 and -7.  $1 \times 10^6$  MM3MG-HER2 cells were subcutaneously injected to the left legs of mice on day 0. Tumor growth in each group is shown.  $n = 10$  mice per group. 30 mice in total. For C, D, and E, error bars represent SD. For F, error bars represent SE. \*:  $P$  value < 0.05, \*\*:  $P$  value < 0.01, \*\*\*:  $P$  value < 0.001.

## Supplementary Figure 4

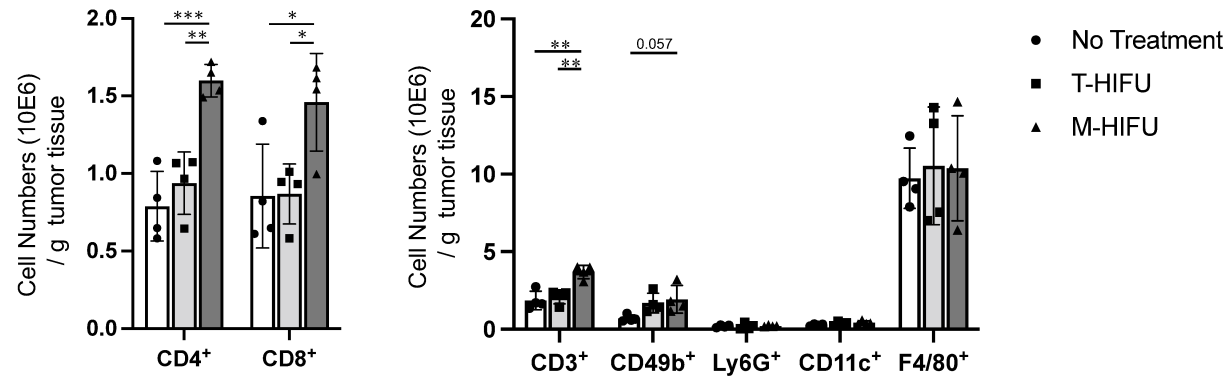

**Supplementary Figure 4. Enhanced intratumoral infiltration of activated CD4+ and CD8+ cells by M-HIFU.**  $1 \times 10^6$  MM3MG-HER2 cells were injected into legs of BALB/c mice.

Established leg tumors were treated with M-HIFU or T-HIFU on day 7 after tumor inoculation.

Seven days after HIFU treatments of MM3MG-HER2 tumors in mice, tumors were collected and

digested for flow cytometry analysis. The cell numbers of CD4+, CD8+, CD49b+, Ly6G+,

CD11c+ and F4/80+ cells in 1 g of tumor tissue were analyzed for each HIFU treatment group.

The following formula was used. Numbers of infiltrating cells per 1 g of tumor tissue = [Cell count by trypan blue dye exclusion method using hemocytometer] x [percentages of CD45+ cells / 100] x [percentages of cell types in CD45+ cells / 100] x [1 / weight of collected tumor (g)].

n = 4 per group and bar represents SD. One way ANOVA test was performed for statistical

analysis. \*: P value < 0.05, \*\*: P value < 0.01, \*\*\*: P value < 0.001.

## Supplementary Figure 5

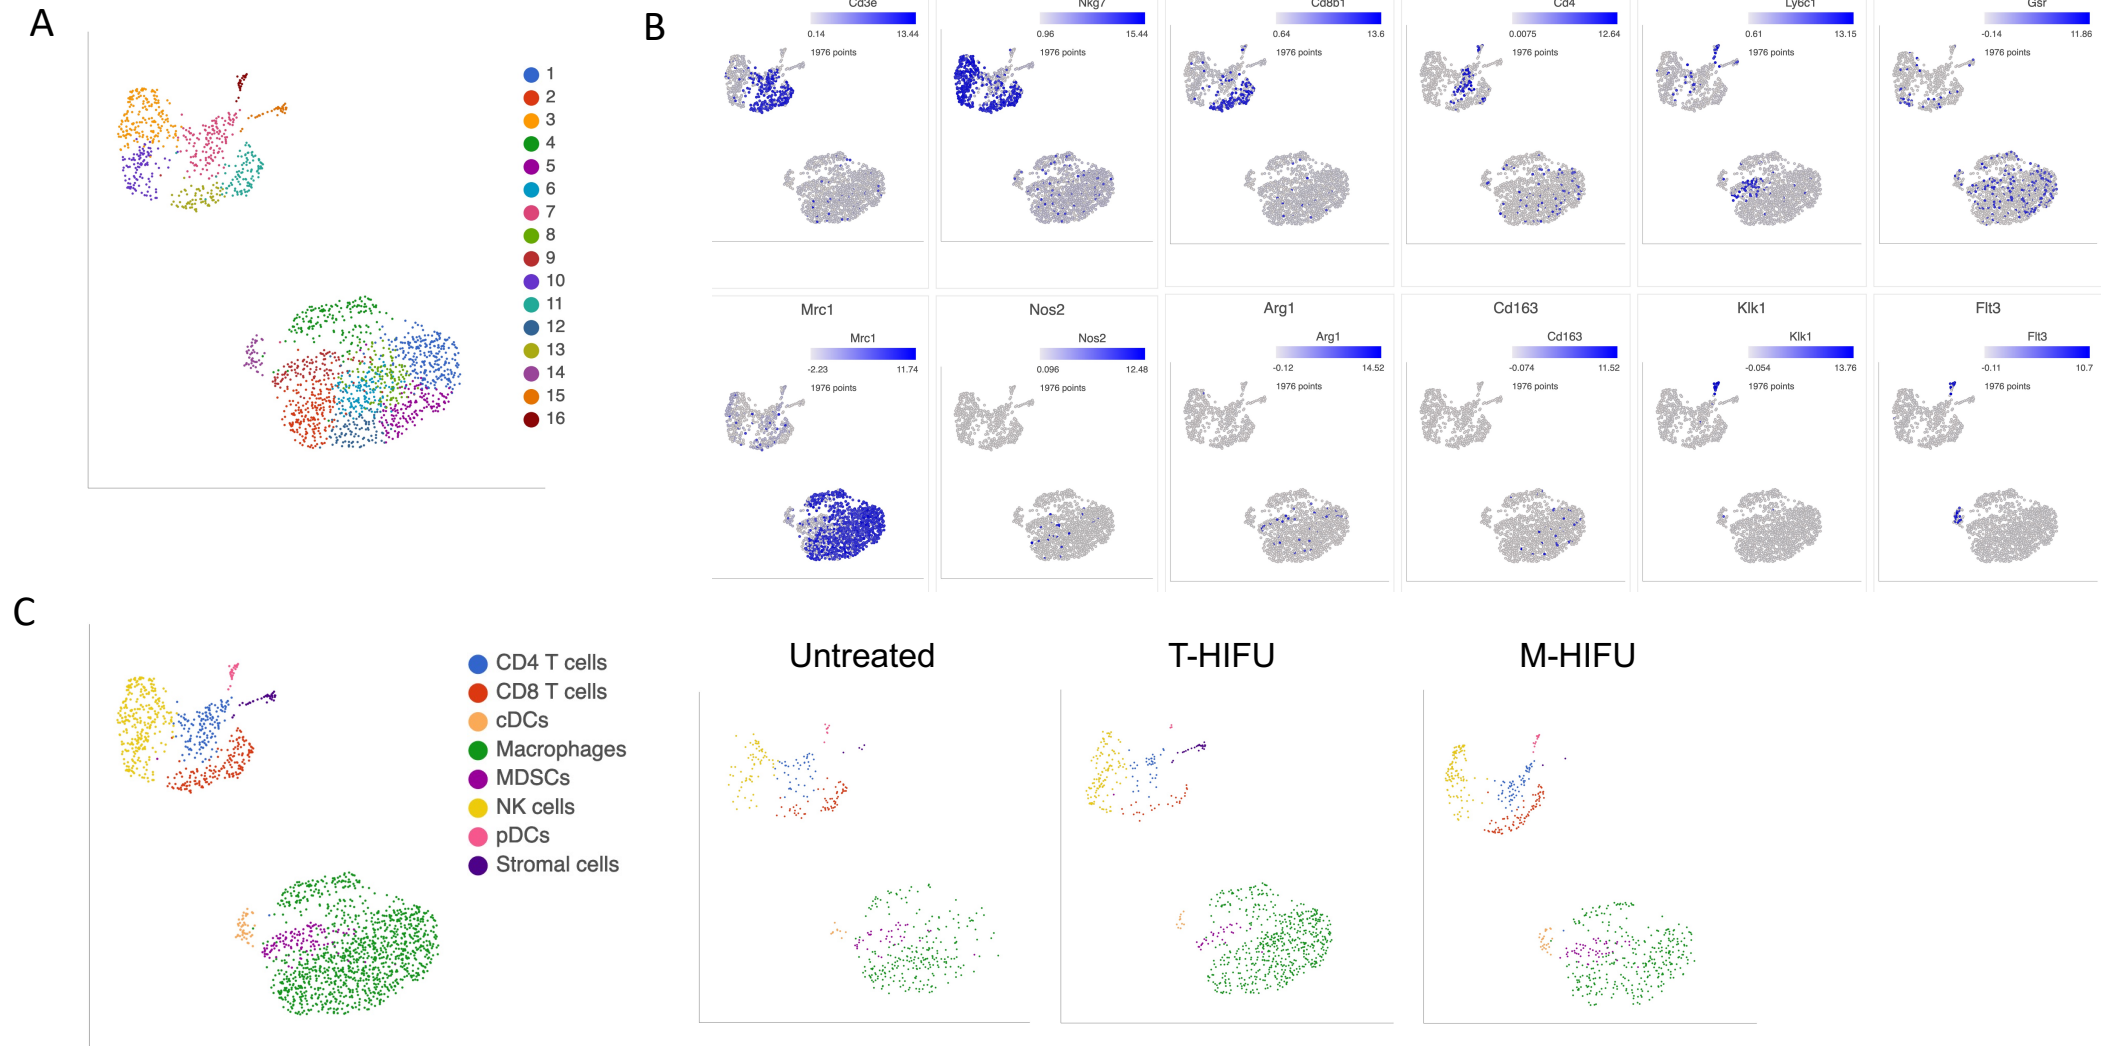

**Supplementary Figure 5. Graph-based clustering of tumor-infiltrating leukocytes and Cluster Annotation.** Established MM3MG-HER2 leg tumors in BALB/c mice were treated with T- or M-HIFU. Eight days after HIFU treatment, tumors were collected, and alive CD45<sup>+</sup> Tumor-infiltrating leukocytes (TILs) were isolated from tumor digests by flow-based sorting. scRNA-sequencing was performed using Illumina system. Sequencing was performed as described in Materials and Methods. **(A)** Graph-based clustering is shown. **(B)** Feature plots are shown for cluster annotation. **(C)** Cluster Annotation was made and shown for TILs from untreated, M-HIFU and T-HIFU treated tumors.

## Supplementary Figure 6

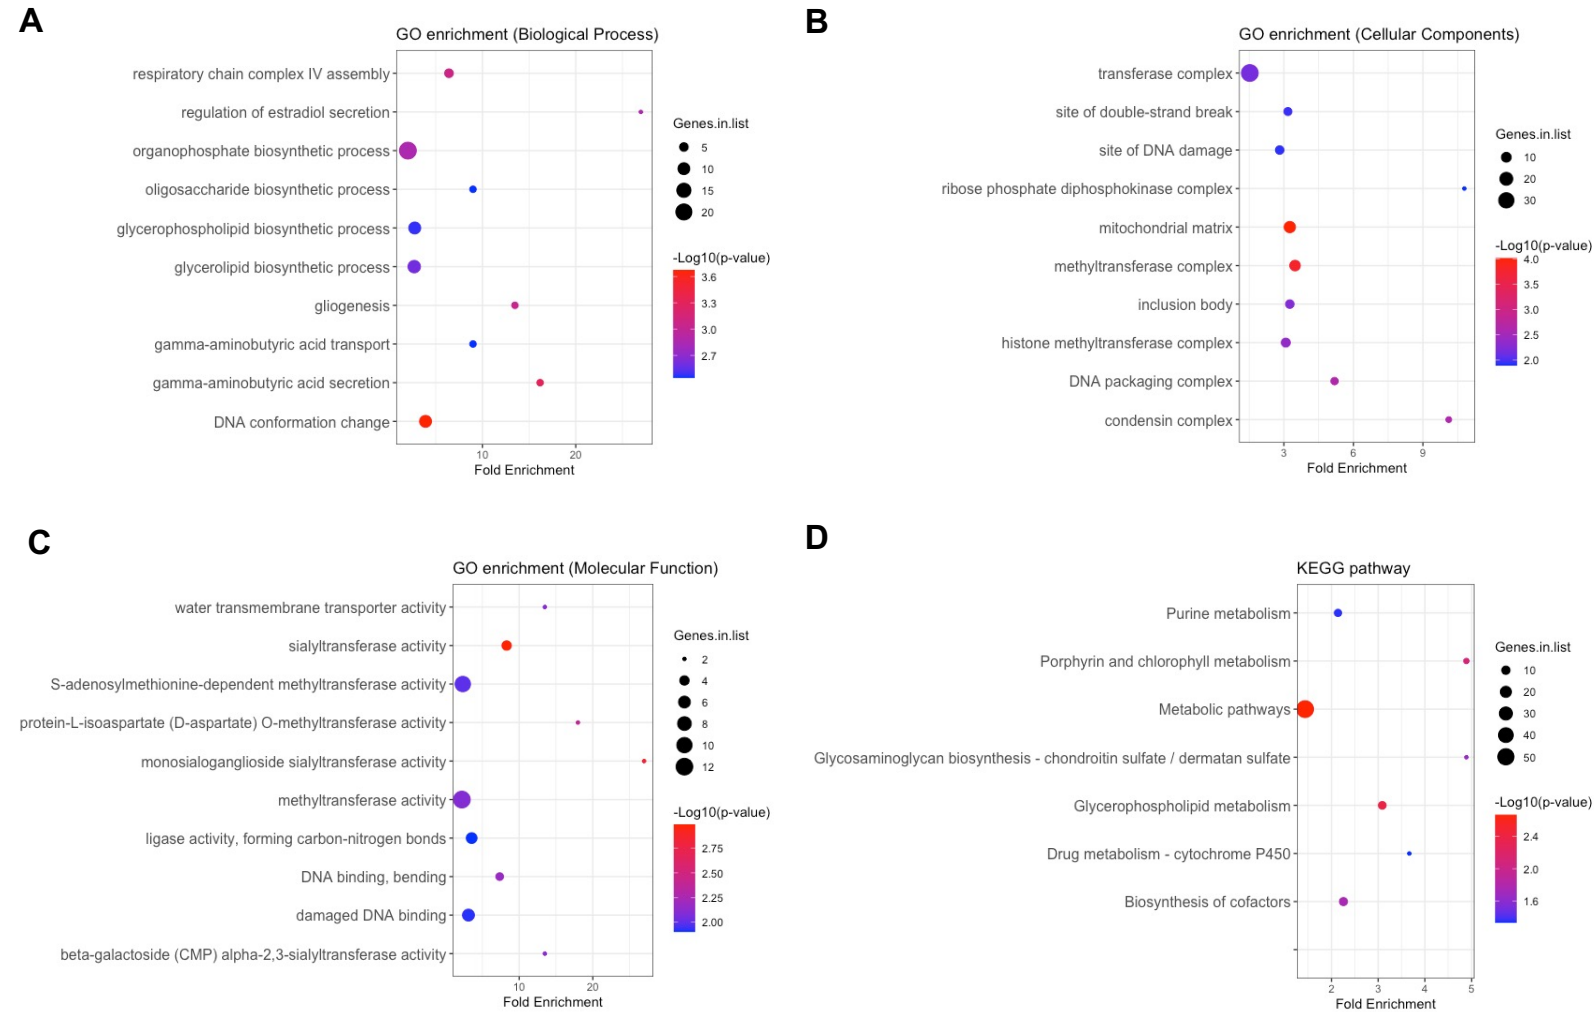

**Supplementary Figure 6. Gene Ontology enrichment analysis and KEGG pathway analysis of the differentially expressed genes in tumor-infiltrating macrophages from T-HIFU-treated tumors.** **A-C)** Differentially expressed genes that were upregulated in macrophages from T-HIFU treated tumors compared to macrophages from control untreated tumors were evaluated for their biological functions by GO enrichment analysis. Top 10 GO terms in biological process category (**A**), cellular components category (**B**) and molecular function category (**C**), ranked by enrichment scores are shown. **D)** Differentially expressed genes were analyzed by KEGG pathway analysis. Top 10 Biological Process terms (**A-C**) or 7 KEGG pathways (**D**) that were significantly upregulated in T-HIFU treated tumors are shown. Only 7 KEGG pathways were significantly different.

## Supplementary Figure 7

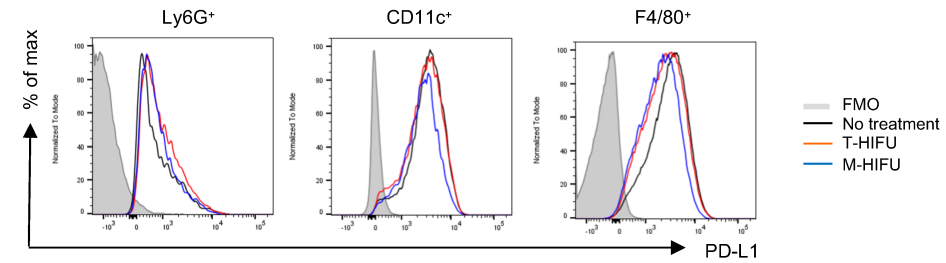

**Supplementary Figure 7. Expression of immune checkpoint molecules on tumor associated immune cells in earlier phase after HIFU treatment.**  $1 \times 10^6$  MM3MG-HER2 cells were injected into legs of BALB/c mice. Established MM3MG-HER2 leg tumors were treated with T- or M-HIFU or left untreated. Three days after HIFU, tumors were collected and digested tumors were analyzed by flow cytometry. Ly6G+, CD11c+ or F4/80+ cells in alive CD45+ leukocytes were analyzed for their expression level of PD-L1. Representative cases are shown. Blue: M-HIFU, red: T-HIFU, black: no treatment, grey filled: isotype control.

## Supplementary Figure 8

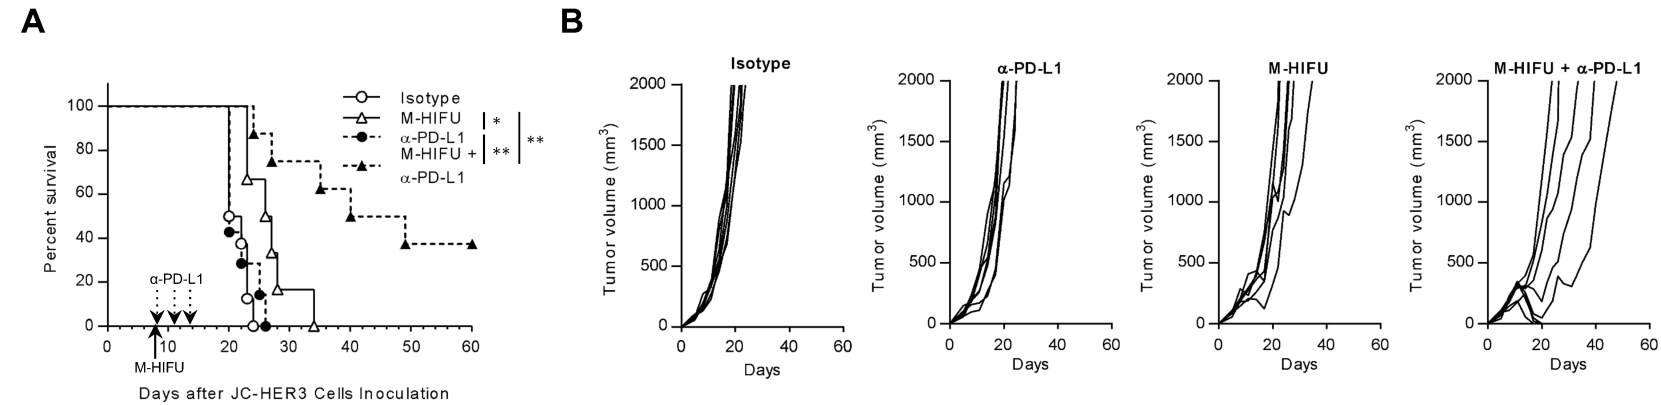

**Supplementary Figure 8. Antitumor efficacy of combined M-HIFU and anti-PD-L1 antibody against JC-HER3 breast cancer model.** (A-B)  $1 \times 10^6$  JC-HER3 cells were injected into legs of BALB/c mice. Established leg tumors were treated with M-HIFU on day 8 after tumor inoculation. Anti-PD-L1 antibody (200  $\mu\text{g}$  /100  $\mu\text{L}$ ) or Isotype IgG (200  $\mu\text{g}$  /100  $\mu\text{L}$ ) were injected intraperitoneally on day 8, 11 and 15. (A) Survival curves are shown and log-rank test was performed. (B) Individual tumor growth curves are shown. n=6 mice (M-HIFU), 7 (anti-PD-L1) or 8 (Isotype, Combination). 29 mice in total. Error bar represents mean  $\pm$  SD. \*:  $P$  value < 0.05, \*\*:  $P$  value < 0.01.



## Supplementary Figure 9

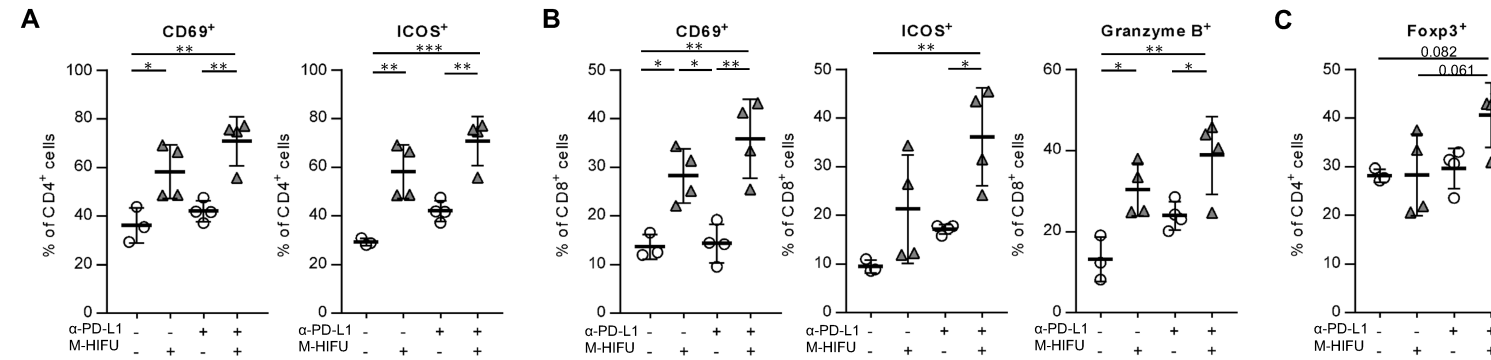

**Supplementary Figure 9. Flow Cytometry Analysis of TILs in MM3MG-HER2 tumors treated with combined M-HIFU and anti-PD-L1 antibody.** Established MM3MG-HER2 leg tumors were treated with M-HIFU followed by intraperitoneal injection of anti-PD-L1 antibody or Isotype IgG 5 and 8 days after M-HIFU treatment, and tumors were collected 9 days after M-HIFU. Tumors were minced and enzymatically digested to collect single cell suspension of tumor-infiltrating leukocytes. Alive singlet CD45<sup>+</sup> leukocytes were analyzed for the following; **(A)** the expression of CD69 and ICOS by CD4<sup>+</sup>, **(B)** the expression of CD69, ICOS and Granzyme B by CD8<sup>+</sup> cells, and **(C)** the expression of Foxp3<sup>+</sup> by CD4<sup>+</sup> cells. N=4 per each group. Error bars represent SD. \*: *P* value < 0.05, \*\*: *P* value < 0.01, \*\*\*: *P* value < 0.001.

## Supplementary Figure 10

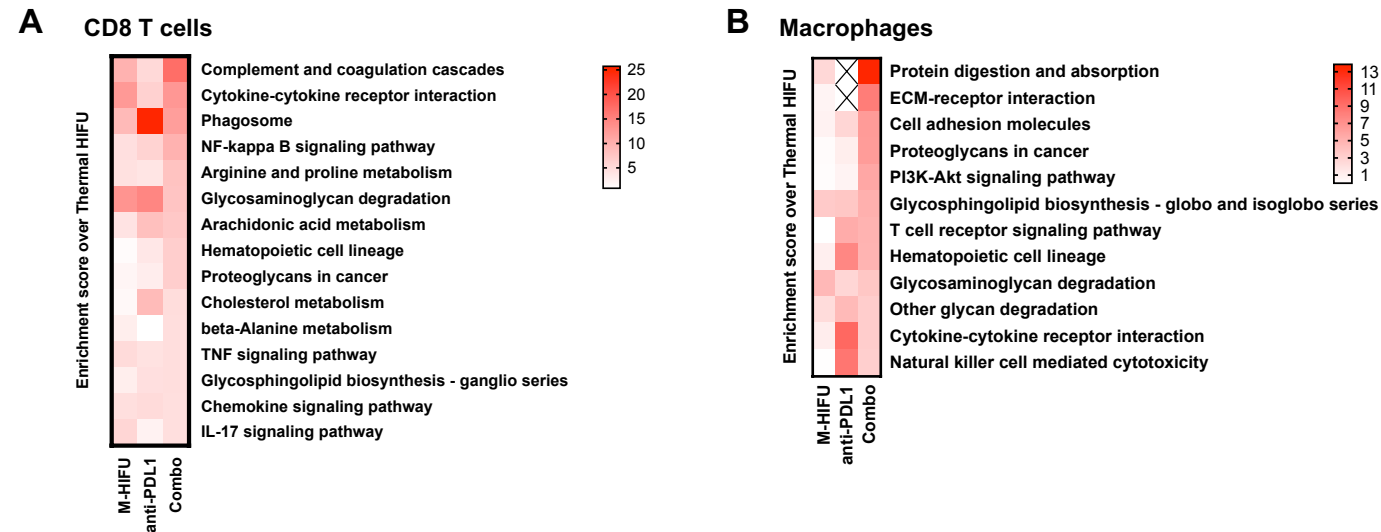

**Supplementary Figure 10. KEGG pathway analysis of the differentially expressed genes in tumor-infiltrating CD8 T cells and macrophages.** Differentially expressed genes upregulated in treatment groups compared to no treatment control were analyzed by KEGG pathway analysis using Partek Flow software. Top 15 KEGG pathways for CD8 T cells (**A**) and top 12 pathways for macrophages (**B**) that showed the highest enrichment scores in the combination treatment are shown.

## Supplementary Figure 11

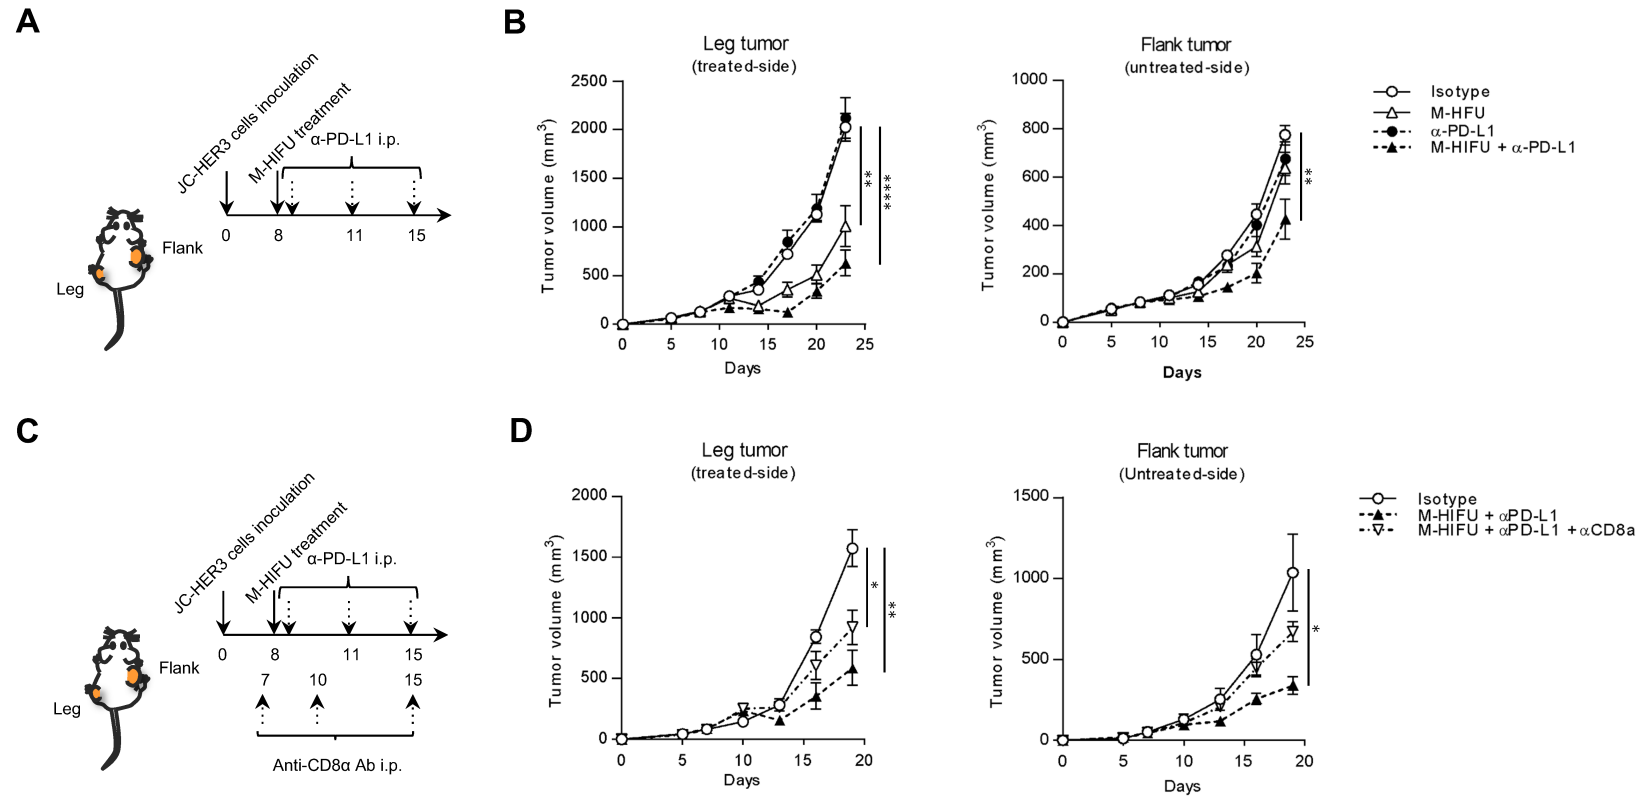**Supplementary Figure 11. Enhanced abscopal effect induced by combined M-HIFU and anti-PD-L1 antibody.**

(A) JC-HER3 cells were injected into both the left leg ( $1 \times 10^6$ ) and the right flank ( $5 \times 10^5$ ) of HER3 transgenic mice on day 0. Established leg tumors were treated with M-HIFU on day 8. Anti-PD-L1 antibody (200  $\mu$ g /100  $\mu$ L) or Isotype IgG (200  $\mu$ g /100  $\mu$ L) were injected intraperitoneally on day 8, 11, 15 and 18. (B) Tumor growth curves of leg tumors and flank tumors are shown for each treatment group.  $n=7$  mice per each group. 28 mice in total. (C) The mice were treated as described in Figure 4E legend in the presence of depleting antibody for CD8a<sup>+</sup> cells on day 7, 10 and 15. (D) Tumor growth curves of both leg and flank tumors are shown.  $n=5$  mice per each group. 15 mice in total. Error bar represents mean  $\pm$  SE; \*:  $P$  value < 0.05, \*\*:  $P$  value < 0.01, \*\*\*:  $P$  value < 0.001, \*\*\*\*:  $P$  value < 0.0001.

## Supplementary Figure 12

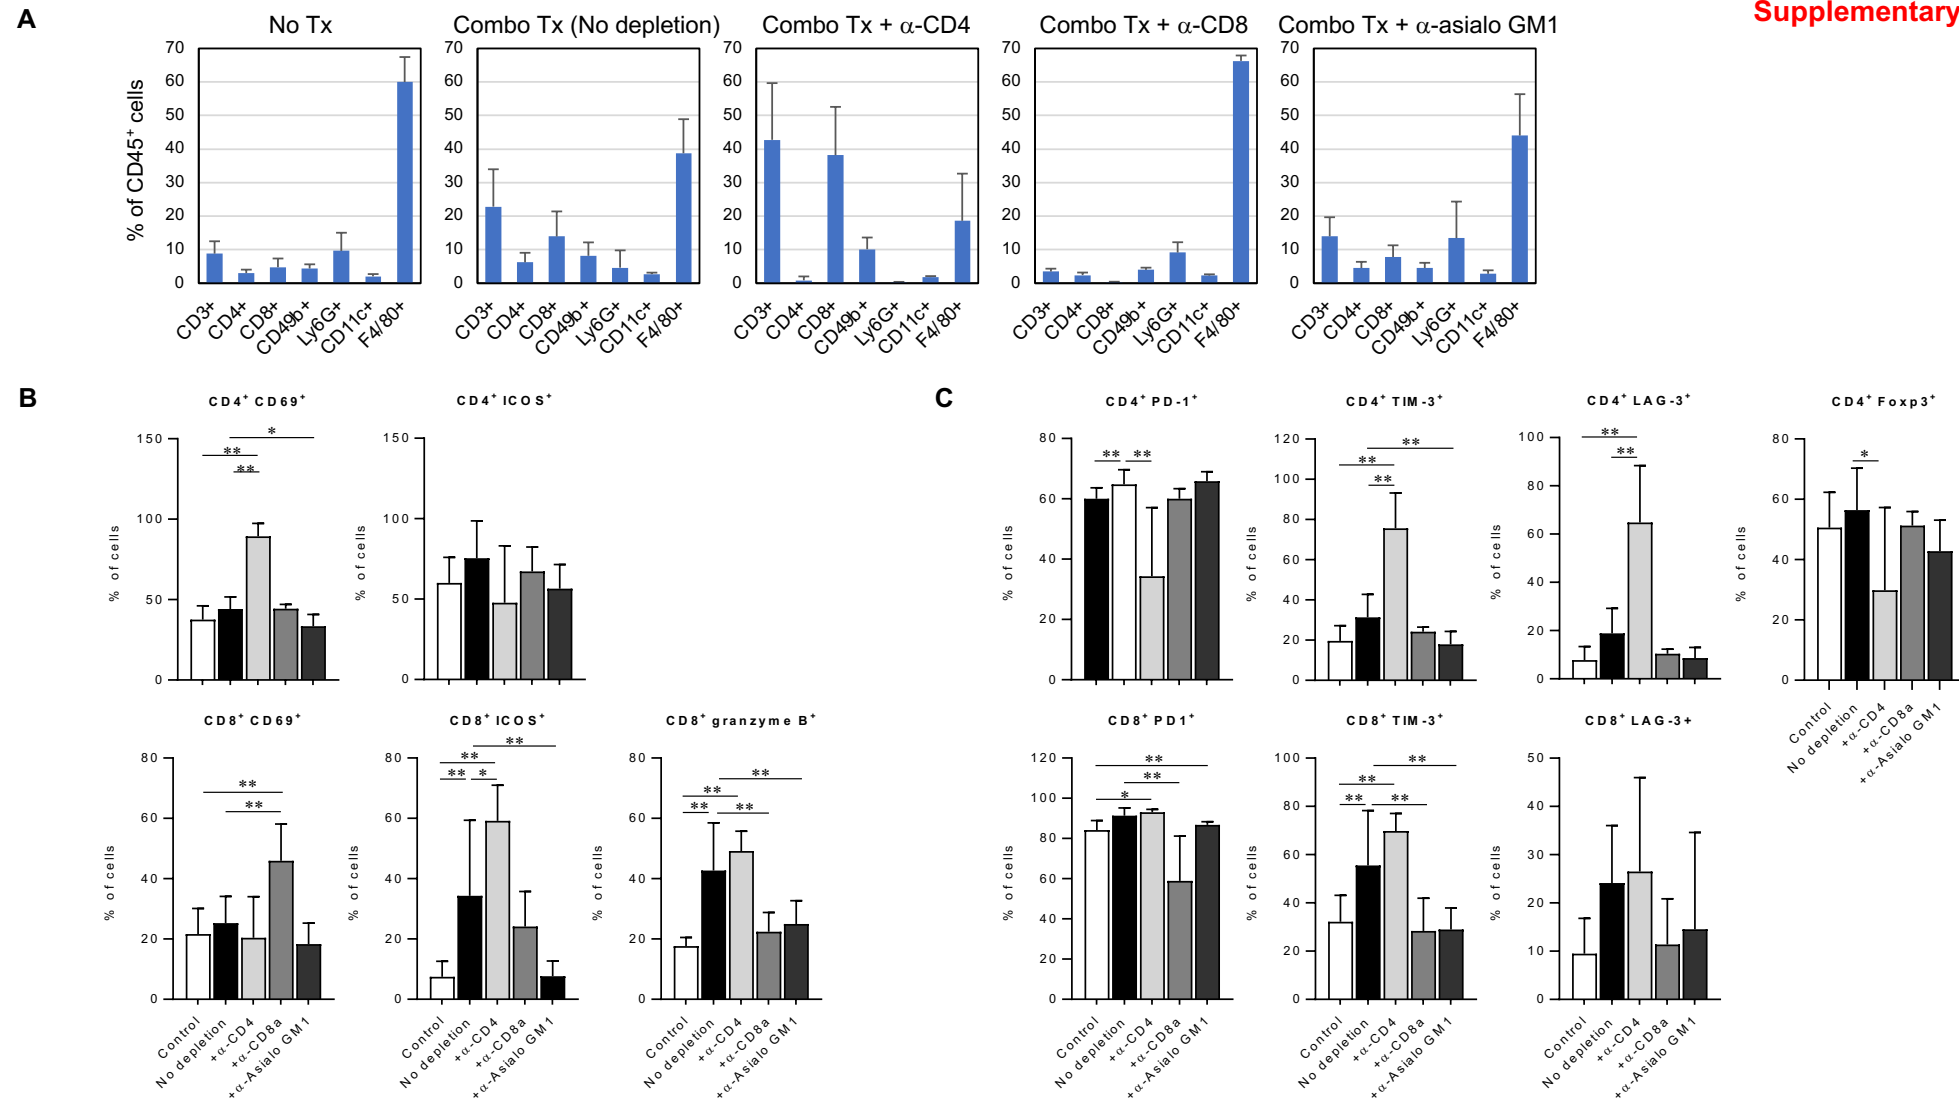

**Supplementary Figure 12. Activation and exhaustion status of T cells infiltrating into remote tumors in mice administered with depletion antibodies.** MM3MG-HER2 cells were injected into both the left leg ( $1 \times 10^6$ ) and the right flank ( $5 \times 10^5$ ) of BALB/c mice on day 0. Established leg tumors were treated with M-HIFU on day 7. Anti-PD-L1 antibody (100  $\mu$ g /100  $\mu$ L) or Isotype IgG (100  $\mu$ g /100  $\mu$ L) were injected intraperitoneally on day 10, 13 and 16. The mice were also treated with depleting antibody for CD4<sup>+</sup>, CD8a<sup>+</sup> and NK cells on day 6, 9 and 14. Mice were euthanized on day19 after tumor inoculation, and remote untreated-tumors were collected. **A**) Immune cell profile was analyzed for each group. **B**) CD69 and ICOS on residual intratumoral CD4<sup>+</sup> cells and CD69, ICOS and granzyme B on residual intratumoral CD8<sup>+</sup> cells were analyzed with flow cytometry. **C**) immune checkpoint molecules on residual intratumoral T lymphocytes and Treg population were analyzed with flow cytometry. N=3 mice for CD 4 depletion group, n=5 mice for other groups. Bar represents SD.
