# Supplementary material for: Combination of ultrasound-based mechanical disruption of tumor with immune checkpoint blockade modifies tumor microenvironment and augments systemic antitumor immunity
Source: PubMed Central journal article supplement — J Immunother Cancer. 2022 Jan 17;10(1):e003717. doi: 10.1136/jitc-2021-003717 (PMC8765068; doi:10.1136/jitc-2021-003717), 2022-01-17
Supplement: jitc-2021-003717supp004.pdf [file jitc-2021-003717supp004.pdf]

## Supplemental Data

**Combination of ultrasound-based mechanical disruption of tumor with immune checkpoint blockade modifies tumor microenvironment and augments systemic antitumor immunity**

Shinya Abe, Hiroshi Nagata, Erika J. Crosby, Yoshiyuki Inoue, Kensuke Kaneko, Cong-xiao Liu, Xiao Yi Yang, Tao Wang, Chaitanya Acharya, Pankaj Agarwal, Josh Snyder, William R. Gwin, Michael A. Morse, Pei Zhong, H. Kim Lyerly, and Takuya Osada

**Figure 1. Superior growth suppression of local and distant tumors and enhanced tumor antigen-specific cellular immune responses by M-HIFU compared to T-HIFU.**

**Figure 1A.**

| Leg Tumor    | Tumor Volume on day 16 (mm <sup>3</sup> ) |       |      |                 |              |
|--------------|-------------------------------------------|-------|------|-----------------|--------------|
| Group        | Average                                   | SD    | SEM  | Range           | Mouse number |
| No treatment | 1681.6                                    | 236.9 | 79.0 | 1330.0 – 2138.2 | n = 9        |
| T-HIFU       | 1375.5                                    | 339.0 | 94.0 | 910.3 – 1923.8  | n = 13       |
| M-HIFU       | 190.4                                     | 156.5 | 49.5 | 0.0 – 447.0     | n = 10       |

**Figure 1C.**

| Flank Tumor  | Tumor Volume on day 18 (mm <sup>3</sup> ) |       |       |              |              |
|--------------|-------------------------------------------|-------|-------|--------------|--------------|
| Group        | Average                                   | SD    | SEM   | Range        | Mouse number |
| No treatment | 1015.2                                    | 773.8 | 214.6 | 0.0 – 2687.7 | n = 13       |
| T-HIFU       | 800.2                                     | 691.7 | 184.9 | 0.0 – 2146.9 | n = 14       |
| M-HIFU       | 410.1                                     | 464.8 | 124.2 | 0.0 – 1431.1 | n = 14       |

**Figure 5. M-HIFU and PD-L1 blockade synergize to reject local tumor.****Figure 5B.**

| Flank Tumor<br>Group | Tumor Volume on day 18 (mm <sup>3</sup> ) |       |       |               | Mouse<br>number |
|----------------------|-------------------------------------------|-------|-------|---------------|-----------------|
|                      | Average                                   | SD    | SEM   | Range         |                 |
| Isotype              | 1622.9                                    | 644.2 | 203.7 | 18.0 – 2401.7 | n = 10          |
| aPD-L1               | 980.1                                     | 749.2 | 236.9 | 0.0 – 1763.3  | n = 10          |
| M-HIFU               | 513.9                                     | 600.3 | 189.8 | 0.0 – 1494.7  | n = 10          |
| M-HIFU + aPD-L1      | 276.7                                     | 314.9 | 99.6  | 0.0 – 841.0   | n = 10          |

**Figure 5F.**

| Leg Tumor<br>Group          | Tumor Volume on day 19 (mm <sup>3</sup> ) |       |       |                 | Mouse<br>number |
|-----------------------------|-------------------------------------------|-------|-------|-----------------|-----------------|
|                             | Average                                   | SD    | SEM   | Range           |                 |
| Isotype                     | 1987.2                                    | 453.8 | 202.9 | 1203.1 – 2378.5 | n = 5           |
| M-HIFU + aPD-L1             | 128.4                                     | 245.3 | 100.1 | 0.0 – 621.0     | n = 6           |
| M-HIFU + aPD-L1 + aCD4      | 28.0                                      | 38.4  | 17.2  | 0.0 – 72.0      | n = 5           |
| M-HIFU + aPD-L1 + aCD8a     | 1105.1                                    | 391.7 | 159.9 | 671.6 – 1737.3  | n = 6           |
| M-HIFU + aPD-L1 + aAsiaoGM1 | 969.9                                     | 404.7 | 165.2 | 328.7 – 1427.5  | n = 6           |

**Figure 7. The combination of M-HIFU and PD-1/PD-L1 blockades synergistically inhibited the distant tumor growth depending on CD8+ as well as NK cells.**

**Figure 7B.**

| Flank Tumor<br>Group | Tumor Volume on day 18 (mm <sup>3</sup> ) |       |       |                 | Mouse<br>number |
|----------------------|-------------------------------------------|-------|-------|-----------------|-----------------|
|                      | Average                                   | SD    | SEM   | Range           |                 |
| Isotype              | 2074.8                                    | 389.4 | 123.1 | 1666.6 – 2250.0 | n = 10          |
| aPD-L1               | 1444.9                                    | 707.7 | 223.8 | 0.0 – 2393.7    | n = 10          |
| M-HIFU               | 1666.7                                    | 640.4 | 202.5 | 730.8 – 2420.6  | n = 10          |
| M-HIFU + aPD-L1      | 921.4                                     | 729.2 | 230.6 | 0.0 – 2025.3    | n = 10          |

**Figure 7F.**

| Leg Tumor<br>Group          | Tumor Volume on day 19 (mm <sup>3</sup> ) |       |       |                 | Mouse<br>number |
|-----------------------------|-------------------------------------------|-------|-------|-----------------|-----------------|
|                             | Average                                   | SD    | SEM   | Range           |                 |
| Isotype                     | 1689.9                                    | 324.3 | 145.1 | 1298.4 – 1928.4 | n = 5           |
| M-HIFU + aPD-L1             | 150.9                                     | 337.4 | 150.9 | 0.0 – 754.4     | n = 5           |
| M-HIFU + aPD-L1 + aCD4      | 82.0                                      | 107.1 | 47.9  | 0.0 – 252.8     | n = 5           |
| M-HIFU + aPD-L1 + aCD8a     | 1049.5                                    | 717.8 | 321.0 | 0.0 – 2098.9    | n = 5           |
| M-HIFU + aPD-L1 + aAsiaoGM1 | 1184.9                                    | 400.4 | 179.1 | 0.0 – 1563.25   | n = 5           |

| Flank Tumor<br>Group        | Tumor Volume on day 19 (mm <sup>3</sup> ) |       |       |                | Mouse<br>number |
|-----------------------------|-------------------------------------------|-------|-------|----------------|-----------------|
|                             | Average                                   | SD    | SEM   | Range          |                 |
| Isotype                     | 1323.5                                    | 270.7 | 121.1 | 991.9 – 1663.5 | n = 5           |
| M-HIFU + aPD-L1             | 732.6                                     | 292.0 | 130.6 | 0.0 – 1090.4   | n = 5           |
| M-HIFU + aPD-L1 + aCD4      | 256.6                                     | 227.9 | 101.9 | 0.0 – 523.3    | n = 5           |
| M-HIFU + aPD-L1 + aCD8a     | 1842.8                                    | 525.5 | 235.0 | 0.0 – 2573.2   | n = 5           |
| M-HIFU + aPD-L1 + aAsiaoGM1 | 1362.8                                    | 290.8 | 130.0 | 0.0 – 1561.6   | n = 5           |

**Supplementary Figure 1. Stronger tumor growth suppression and abscopal effect induced by M-HIFU against murine breast cancers.**

**Supplementary Figure 1A.**

| E0771-OVA Leg Tumor | Tumor Volume on day 16 (mm <sup>3</sup> ) |       |       |                 |              |
|---------------------|-------------------------------------------|-------|-------|-----------------|--------------|
| Group               | Average                                   | SD    | SEM   | Range           | Mouse number |
| No treatment        | 2508.0                                    | 431.7 | 193.1 | 1847.3 – 2997.2 | n = 6        |
| T-HIFU              | 1600.4                                    | 189.6 | 84.8  | 1439.4 – 1934.3 | n = 6        |
| M-HIFU              | 1245.4                                    | 498.3 | 203.4 | 291.2 – 1628.3  | n = 6        |

**Supplementary Figure 1B.**

| JC-HER3 Leg Tumor | Tumor Volume on day 24 (mm <sup>3</sup> ) |       |       |                 |              |
|-------------------|-------------------------------------------|-------|-------|-----------------|--------------|
| Group             | Average                                   | SD    | SEM   | Range           | Mouse number |
| No treatment      | 2531.6                                    | 376.3 | 125.4 | 1858.4 – 2888.1 | n = 9        |
| M-HIFU            | 1182.5                                    | 767.9 | 256.0 | 262.4 – 2305.8  | n = 9        |

**Supplementary Figure 1C.**

| JC-HER3 Leg Tumor | Tumor Volume on day 24 (mm <sup>3</sup> ) |       |       |                 |              |
|-------------------|-------------------------------------------|-------|-------|-----------------|--------------|
| Group             | Average                                   | SD    | SEM   | Range           | Mouse number |
| No treatment      | 1762.9                                    | 399.9 | 133.3 | 1230.1 – 2271.6 | n = 9        |
| M-HIFU            | 788.7                                     | 373.3 | 124.4 | 228.5 – 1410.4  | n = 9        |

| JC-HER3 Flank Tumor | Tumor Volume on day 24 (mm <sup>3</sup> ) |       |      |                |              |
|---------------------|-------------------------------------------|-------|------|----------------|--------------|
| Group               | Average                                   | SD    | SEM  | Range          | Mouse number |
| No treatment        | 933.1                                     | 185.5 | 61.8 | 645.0 – 1121.0 | n = 9        |
| M-HIFU              | 591.9                                     | 176.7 | 58.9 | 254.6 – 874.6  | n = 9        |

**Supplementary Figure 3. Cell death and immunogenicity of HIFU treated MM3MG-HER2 breast cancer cells.**

**Supplementary Figure 3F.**

| Flank Tumor  | Tumor Volume on day 13 (mm <sup>3</sup> ) |       |       |                |              |
|--------------|-------------------------------------------|-------|-------|----------------|--------------|
| Group        | Average                                   | SD    | SEM   | Range          | Mouse number |
| No treatment | 1407.9                                    | 382.2 | 120.9 | 704.1 – 2160.9 | n = 10       |
| T-HIFU       | 553.8                                     | 537.3 | 169.9 | 0.0 – 1343.5   | n = 10       |
| M-HIFU       | 665.2                                     | 533.1 | 168.6 | 0.0 – 1409.5   | n = 10       |

**Supplementary Figure 8. Antitumor efficacy of combined M-HIFU and anti-PD-L1 antibody against JC-HER3 breast cancer model.**

**Supplementary Figure 8B.**

| JC-HER3 Leg Tumor | Tumor Volume on day 20 (mm <sup>3</sup> ) |       |       |                 |              |
|-------------------|-------------------------------------------|-------|-------|-----------------|--------------|
| Group             | Average                                   | SD    | SEM   | Range           | Mouse number |
| Isotype           | 1936.0                                    | 620.4 | 234.5 | 1250.0 – 2786.9 | n = 8        |
| M-HIFU            | 974.6                                     | 383.3 | 156.5 | 324.6 – 1433.4  | n = 6        |
| aPD-L1            | 1762.7                                    | 519.4 | 212.0 | 1023.4 – 2218.0 | n = 7        |
| M-HIFU + aPD-L1   | 356.7                                     | 461.1 | 174.3 | 0.0 – 1189.8    | n = 8        |

**Supplementary Figure 11. Enhanced abscopal effect induced by combined M-HIFU and anti-PD-L1 antibody.****Supplementary Figure 11B.**

| JC-HER3 Leg Tumor | Tumor Volume on day 23 (mm <sup>3</sup> ) |       |       |                 |              |
|-------------------|-------------------------------------------|-------|-------|-----------------|--------------|
| Group             | Average                                   | SD    | SEM   | Range           | Mouse number |
| Isotype           | 2028.7                                    | 378.7 | 143.1 | 1661.6 – 2480.0 | n = 7        |
| M-HIFU            | 1009.5                                    | 554.4 | 209.6 | 129.6 – 1903.9  | n = 7        |
| aPD-L1            | 2123.3                                    | 549.9 | 207.8 | 1304.2 – 2645.4 | n = 7        |
| M-HIFU + aPD-L1   | 633.8                                     | 347.0 | 131.1 | 0.0 – 948.7     | n = 7        |

| JC-HER3 Flank Tumor | Tumor Volume on day 23 (mm <sup>3</sup> ) |       |      |                |              |
|---------------------|-------------------------------------------|-------|------|----------------|--------------|
| Group               | Average                                   | SD    | SEM  | Range          | Mouse number |
| Isotype             | 774.9                                     | 108.8 | 41.1 | 667.0 – 984.2  | n = 7        |
| M-HIFU              | 637.6                                     | 173.2 | 65.5 | 450.4 – 914.4  | n = 7        |
| aPD-L1              | 677.3                                     | 188.6 | 71.3 | 488.7 – 1056.3 | n = 7        |
| M-HIFU + aPD-L1     | 426.9                                     | 218.7 | 82.7 | 71.7 – 778.2   | n = 7        |

**Supplementary Figure 11D.**

| JC-HER3 Leg Tumor       | Tumor Volume on day 19 (mm <sup>3</sup> ) |       |       |                 |              |
|-------------------------|-------------------------------------------|-------|-------|-----------------|--------------|
| Group                   | Average                                   | SD    | SEM   | Range           | Mouse number |
| Isotype                 | 1574.9                                    | 340.6 | 152.3 | 1238.3 – 2105.1 | n = 5        |
| M-HIFU + aPD-L1         | 588.1                                     | 328.7 | 147.0 | 62.4 – 877.3    | n = 5        |
| M-HIFU + aPD-L1 + aCD8a | 923.0                                     | 317.3 | 141.9 | 502.3 – 1315.5  | n = 5        |

| JC-HER3 Flank Tumor     | Tumor Volume on day 19 (mm <sup>3</sup> ) |       |       |                |              |
|-------------------------|-------------------------------------------|-------|-------|----------------|--------------|
| Group                   | Average                                   | SD    | SEM   | Range          | Mouse number |
| Isotype                 | 1036.5                                    | 532.8 | 238.3 | 542.1 – 1739.6 | n = 5        |
| M-HIFU + aPD-L1         | 339.4                                     | 124.4 | 55.6  | 134.5 – 441.8  | n = 5        |
| M-HIFU + aPD-L1 + aCD8a | 672.2                                     | 136.0 | 60.8  | 516.1 – 851.2  | n = 5        |
